# Supplementary material for: Complementary Role of the Computed Biomodelling through Finite Element Analysis and Computed Tomography for Diagnosis of Transcatheter Heart Valve Thrombosis
Source: Biomed Res Int. 2018 Oct 22;2018:1346308. doi: 10.1155/2018/1346308 (PMC6217904; doi:10.1155/2018/1346308)
Supplement: Supplementary Materials — Video 1: TAVR of prohibitive surgical risk. The video shows the success of the implanted CoreValve 26 mm with restoration of adequate surface of aortic area. Video 2: 1 year later cineangiography shows thrombus formation of right and left coronary ostia. [file 1346308.f1.zip]

Archive with 3 entries (2 files):
- 1346308.f1/
- 1346308.f1/Video 1 (1).mp4
- 1346308.f1/Video_2 (1).avi
